# Supplementary material for: Formation, radiative forcing, and climatic effects of severe regional haze
Source: Copernicus journal article supplement (doi:10.5194/acp-22-4951-2022), 2022-04-14
Supplement: Supplementary file 1 [file acp-22-4951-2022-supplement.pdf]

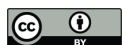

*Supplement of*

## **Formation, radiative forcing, and climatic effects of severe regional haze**

**Yun Lin et al.**

*Correspondence to:* Yun Lin (yunlin@ucla.edu), Yuan Wang (Yuan.Wang@caltech.edu), and Renyi Zhang (renyi-zhang@tamu.edu)

The copyright of individual parts of the supplement might differ from the article licence.

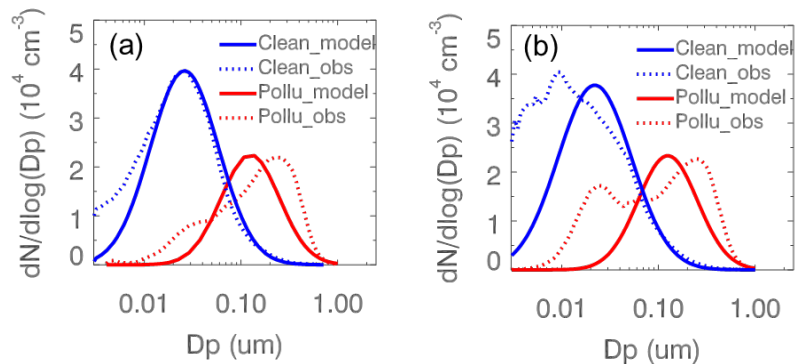

**Figure S1.** Aerosol size distributions from observations and for modeling inputs. Aerosol size distributions taken from measurements on 25 and 28 September (a) and 2 and 5 October (b), 2013 (blue and red dot lines, respectively) and used as inputs for the simulations of the Clean and the HAZE cases (blue and red solid lines, respectively).

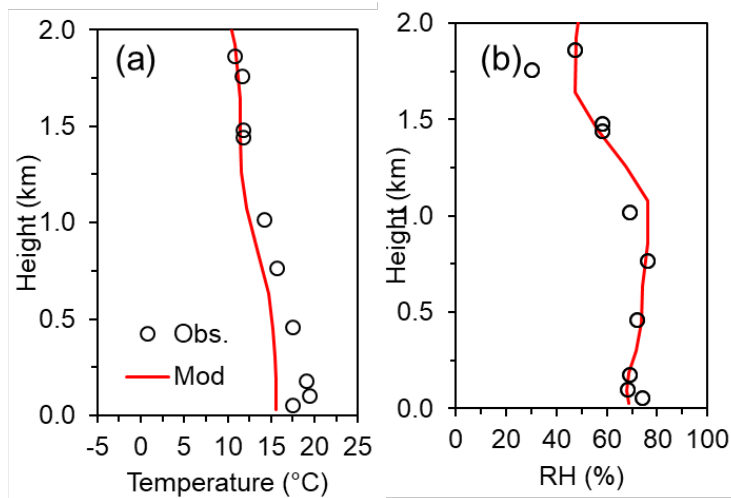

**Figure S2.** Comparison of model simulations with sounding observations. (a) temperature profile at 12Z 28 September 2013; (b) relative humidity profiles at 12Z 28 September 2013. Black open cycles denote sounding profiles and solid lines denote the simulations. Sounding data are available at <http://weather.uwyo.edu/upperair/sounding.html>.

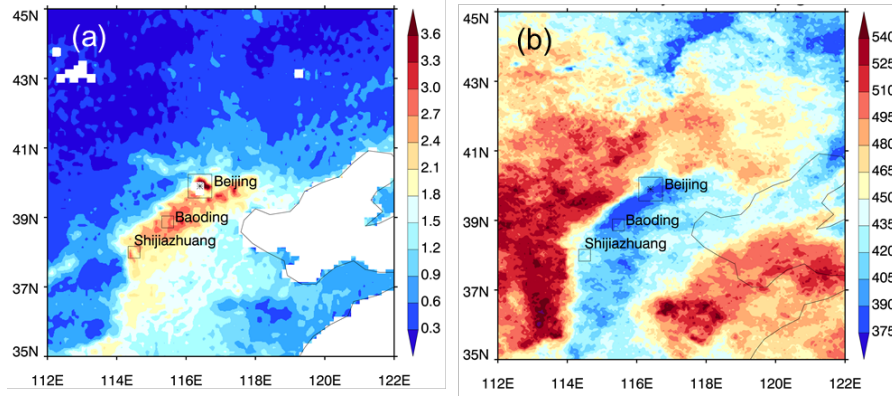

**Figure S3.** MODIS AOD (a) and surface solar radiation (SSR) (b) averaged over all the hazy days in 2013. The megacities of Beijing (BJ), Baoding (BD) and Shijiazhuang (SJZ) are marked as squares.

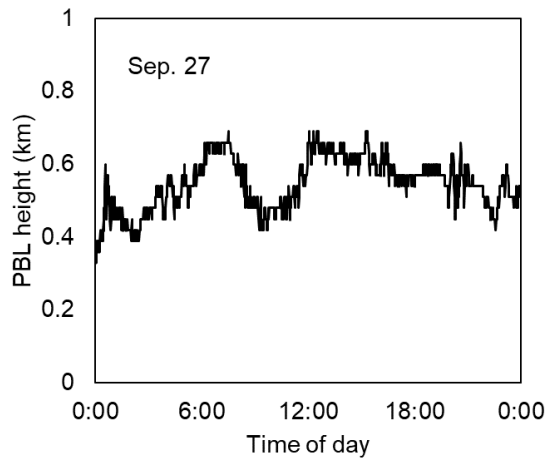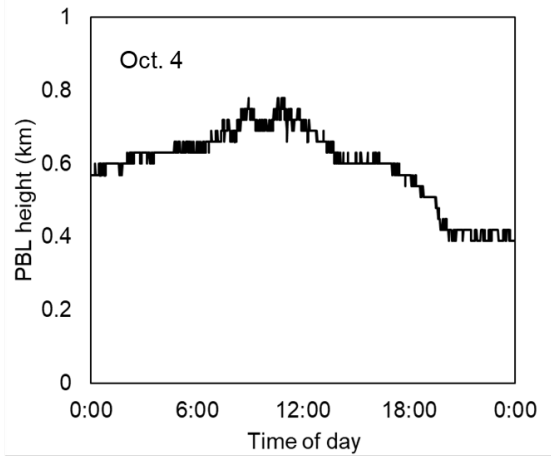

**Figure S4.** PBL heights retrieved from ceilometer measurements on the two transition days.

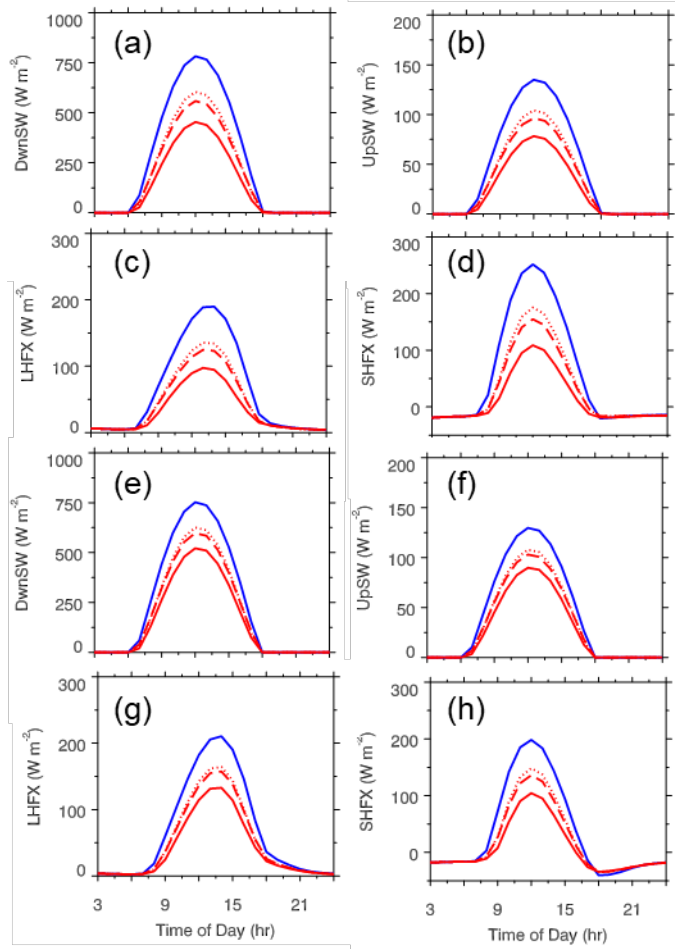

**Figure S5.** Temporal evolutions of downward (a and e) and upward (b and f) shortwave radiation, and latent (c and g) and sensible (d and h) heat fluxes under different aerosol pollution conditions. Panels (a-d) are for EP1 and (e-h) for EP2. Blue solid lines represent CLEAN case, red dot lines represent non-BC case, red dash lines represent “fresh” BC case, and red solid lines represent the HAZE case (or “aged” BC).

**Table S1.** Comparisons of aerosol forcing and BC forcing between this study and other studies.

| <b>Aerosol forcing at TOA (W/m<sup>2</sup>)</b> |            |         |           |           |       |            |
|-------------------------------------------------|------------|---------|-----------|-----------|-------|------------|
| <b>Source</b>                                   | Q2003      | R2007   | L2009     | W2009     | D2016 | This study |
| <b>Method</b>                                   | Model+Obs. | Model   | Obs.      | Model+Obs | Model | Model      |
| <b>Region</b>                                   | China      | Beijing | Xianghe   | Beijing   | China | Beijing    |
| <b>AOD</b>                                      | 0.5~0.8    | 0.65    | >0.2      | 1.78      | -     | 3.1        |
| <b>Forcing</b>                                  | -1~-14     | -20.7   | 2.4       | -21       | 2.4   | -5.6~-5.9  |
| <b>BC forcing at TOA (W/m<sup>2</sup>)</b>      |            |         |           |           |       |            |
| <b>Source</b>                                   | B2013      | P2016   | G2016     | D2016     |       | This study |
| <b>Method</b>                                   | Model      | Model   | Model+Obs | Model     |       | Model      |
| <b>Region</b>                                   | China      | Beijing | Xianghe   | Beijing   |       | Beijing    |
| <b>Forcing</b>                                  | 0.71       | 0.77    | 0.2~1     | 35.8      |       | 20.1~31.2  |

Q2003: Qian et al. (2003)  
R2007: Ramanathan et al. (2007).  
L2009: Li et al. (2007).  
W2009: Wang et al. (2009).  
D2016: Ding et al. (2016).  
B2013: Bond et al. (2013).  
P2016: Peng et al. (2016).  
G2016: Gustafsson and Ramanathan (2016).
